# Supplementary material for: Mindful Aging: The Effects of Regular Brief Mindfulness Practice on Electrophysiological Markers of Cognitive and Affective Processing in Older Adults
Source: Springer Nature journal article supplement (doi:10.1007/s12671-015-0482-8), 2015-12-27
Supplement: MOESM1 [file 6649366]

## Online Resource 1:

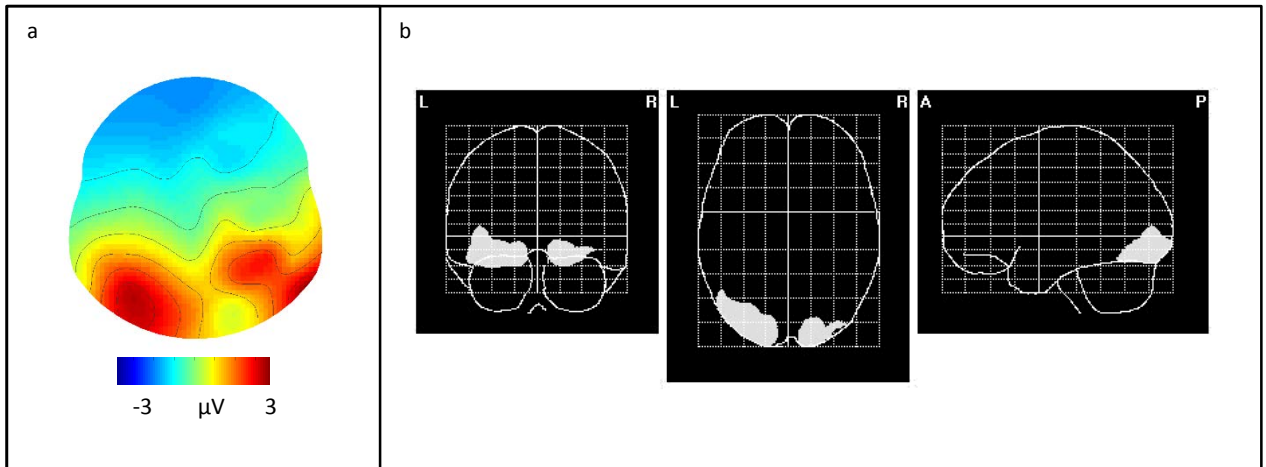

**Panel a:** Grand mean spherical-spline interpolated topographical map of the P1 ERP component (100-120 ms) averaged across all conditions. **Panel b:** Inverse solution of the P1 ERP component depicted in a glass brain. Statistically significant voxels are printed in white (Hotelling  $T^2$  test against zero;  $p < 0.05$ ). Centers of gravity: left and right lateral occipitotemporal gyrus (MNI coordinates: left  $X=-35$   $Y=-84$   $Z=-10$ , right  $X=21$   $Y=-91$   $Z=-13$ ).

### Mindful Aging: The effects of regular brief mindfulness practice on electrophysiological markers of cognitive and affective processing in older adults

#### *Mindfulness*

Peter Malinowski<sup>1</sup>, Adam W. Moore<sup>1</sup>, Bethan R. Mead<sup>2</sup>, Thomas Gruber<sup>3</sup>

<sup>1</sup> Research Centre for Brain and Behaviour, Liverpool John Moores University

<sup>2</sup> Department of Psychological Sciences, Institute of Psychology, Health and Society, University of Liverpool

<sup>3</sup> Institute for Psychology, University of Osnabrück

✉ Peter Malinowski: p.malinowski@ljmu.ac.uk
