# Supplementary material for: Mindful Aging: The Effects of Regular Brief Mindfulness Practice on Electrophysiological Markers of Cognitive and Affective Processing in Older Adults
Source: Springer Nature journal article supplement (doi:10.1007/s12671-015-0482-8), 2015-12-27
Supplement: MOESM2 [file 6649366]

**Mindful Aging: The effects of regular brief mindfulness practice on electrophysiological markers of cognitive and affective processing in older adults**

*Mindfulness*

Peter Malinowski<sup>1</sup>, Adam W. Moore<sup>1</sup>, Bethan R. Mead<sup>2</sup>, Thomas Gruber<sup>3</sup>

<sup>1</sup> Research Centre for Brain and Behaviour, Liverpool John Moores University

<sup>2</sup> Department of Psychological Sciences, Institute of Psychology, Health and Society, University of Liverpool

<sup>3</sup> Institute for Psychology, University of Osnabrück

✉ Peter Malinowski: p.malinowski@ljmu.ac.uk

## Tests for baseline differences

**Supplementary Table 1** Summary of tests (independent t-tests; 2-tailed) for baseline differences of control variables, with mean values (standard deviations) and respective statistical values for the comparison between MTG and BTG

|                            | MTG (N=25)   | BTG (N=25)   | Statistical Values    |            |
|----------------------------|--------------|--------------|-----------------------|------------|
| Age (years)                | 65.3 (6.0)   | 64.0 (6.7)   | $t(48) = .691$        | $p = .493$ |
| FFMQ-total                 | 134.8 (17.6) | 137.6 (18.6) | $t(48) = -.546$       | $p = .587$ |
| Computer Ability           | 6.0 (2.5)    | 6.4 (2.5)    | $t(48) = -.644$       | $p = .523$ |
| Years in education (years) | 13.2 (2.7)   | 13.3 (3.1)   | $t(48) = -.147$       | $p = .883$ |
| Health**                   | 8.0 (1.3)    | 7.6 (2.0)    | $t(47) = .849$        | $p = .400$ |
| Speed of Processing (ms)   | 288 (46)     | 300 (46)     | $t(48) = -.956$       | $p = .344$ |
| GSE                        | 31.1 (4.2)   | 33.2 (4.0)   | $t(48) = -1.830$      | $p = .073$ |
| WEMWBS                     | 54.1 (7.0)   | 54.6 (9.8)   | $t(48) = -.199$       | $p = .843$ |
| Cognitive Activity         | 42.8 (11.4)  | 50.6 (18.8)  | $t(39.42^*) = -1.764$ | $p = .084$ |
| Physical Activity          | 32.5 (11.5)  | 33.6 (11.0)  | $t(48) = -.351$       | $p = .727$ |

\* Levene's test for equality of variances violated, therefore degrees of freedom were adjusted accordingly

\*\* Only 24 participants from the MTG were included in this analysis due to missing data

**Supplementary Table 2** Summary of tests (independent t-tests; 2-tailed) for baseline differences of behavioural performance, with mean values (standard deviations) and respective statistical values for the comparison between MTG and BTG

|                     | MTG (n=22) | BTG (n=22) | Statistical Values |            |
|---------------------|------------|------------|--------------------|------------|
| <b>RT mean (ms)</b> |            |            |                    |            |
| Incongruent         | 835 (140)  | 818 (120)  | $t(42) = .437$     | $p = .664$ |
| Negative            | 762 (118)  | 766 (107)  | $t(42) = -.141$    | $p = .889$ |
| Positive            | 759 (110)  | 761 (98)   | $t(42) = -.084$    | $p = .933$ |
| Neutral             | 758 (117)  | 761 (96)   | $t(42) = -.091$    | $p = .928$ |
| <b>HR (%)</b>       |            |            |                    |            |
| Incongruent         | 92.5 (8.5) | 96.5 (4.2) | $t(31^*) = -1.993$ | $p = .055$ |
| Negative            | 97.1 (2.6) | 98.3 (2.2) | $t(42) = -1.674$   | $p = .102$ |
| Positive            | 97.7 (2.4) | 98.6 (1.8) | $t(42) = -1.351$   | $p = .184$ |
| Neutral             | 97.4 (2.3) | 97.9 (2.9) | $t(42) = -.625$    | $p = .536$ |

\* Levene's test for equality of variances violated, therefore degrees of freedom were adjusted accordingly

## Tests for training-induced changes in control variables

**Supplementary Table 3** Summary of FFMQ, GSE and WEMWBS pre and post mean values (standard deviations) and statistical values for the time x group interactions in the ANOVA

|              | MTG (N=25)   |              | BTG (N=25)   |              | Statistical Values |          |
|--------------|--------------|--------------|--------------|--------------|--------------------|----------|
|              | Pre          | Post         | Pre          | Post         | <i>F</i> (1,48)    | <i>p</i> |
| FFMQ         |              |              |              |              |                    |          |
| Non-reacting | 22.7 (5.1)   | 22.6 (4.8)   | 22.3 (3.9)   | 22.2 (3.4)   | 0.002              | .967     |
| Observing    | 26.5 (5.6)   | 28.8 (4.3)   | 29.5 (4.4)   | 28.4 (3.9)   | 15.907             | .001     |
| Acting-aware | 27.7 (5.5)   | 26.5 (5.8)   | 27.2 (5.3)   | 25.8 (5.1)   | 0.026              | .872     |
| Describing   | 28.6 (5.9)   | 30.4 (5.0)   | 30.6 (5.7)   | 30.6 (5.5)   | 3.343              | .074     |
| Non-judging  | 29.3 (6.2)   | 29.8 (6.1)   | 28.0 (7.3)   | 28.3 (6.6)   | 0.039              | .844     |
| Total        | 134.8 (17.6) | 138.1 (16.6) | 137.6 (18.6) | 135.2 (15.1) | 3.204              | .080     |
| GSE          | 31.1 (4.2)   | 32.2 (3.1)   | 33.2 (4.0)   | 34.1 (4.1)   | 0.081              | .777     |
| WEMWBS       | 54.1 (7.0)   | 55.2 (6.6)   | 54.6 (9.8)   | 54.3 (7.4)   | 0.889              | .351     |
